# Supplementary material
Source: PubMed Central journal article supplement (PMC6117837)

# Supplemental Figures

# Supplemental Figure 1

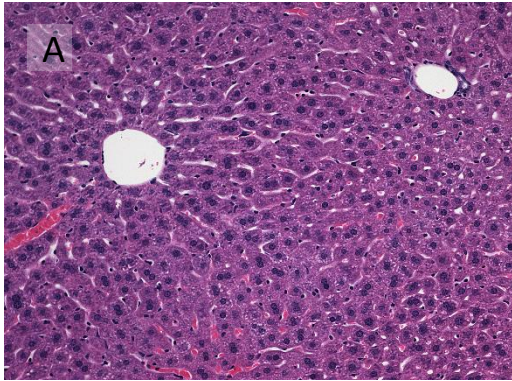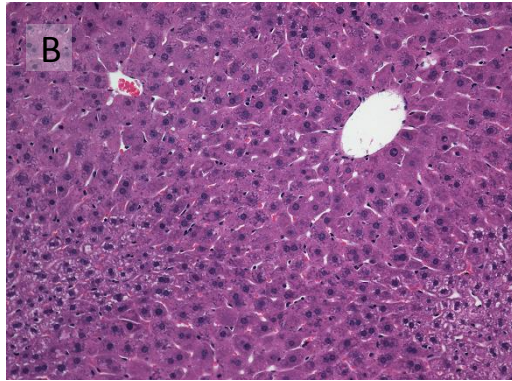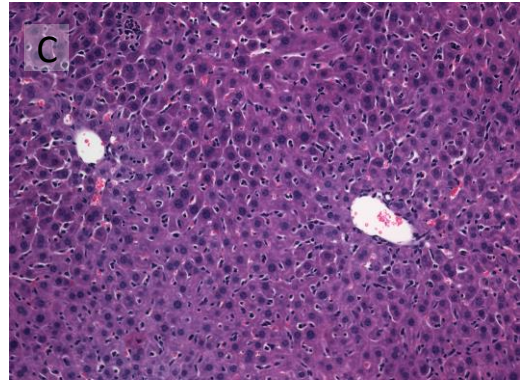

# Supplemental Figure 2

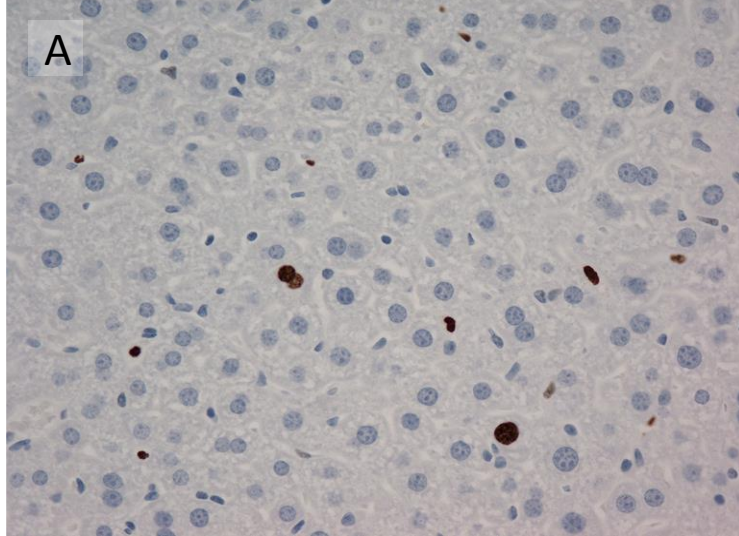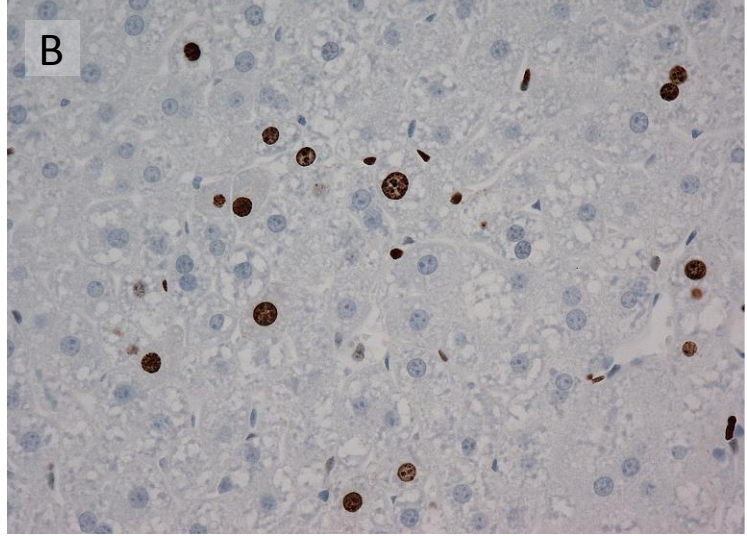

Supplemental Figure 3A

A

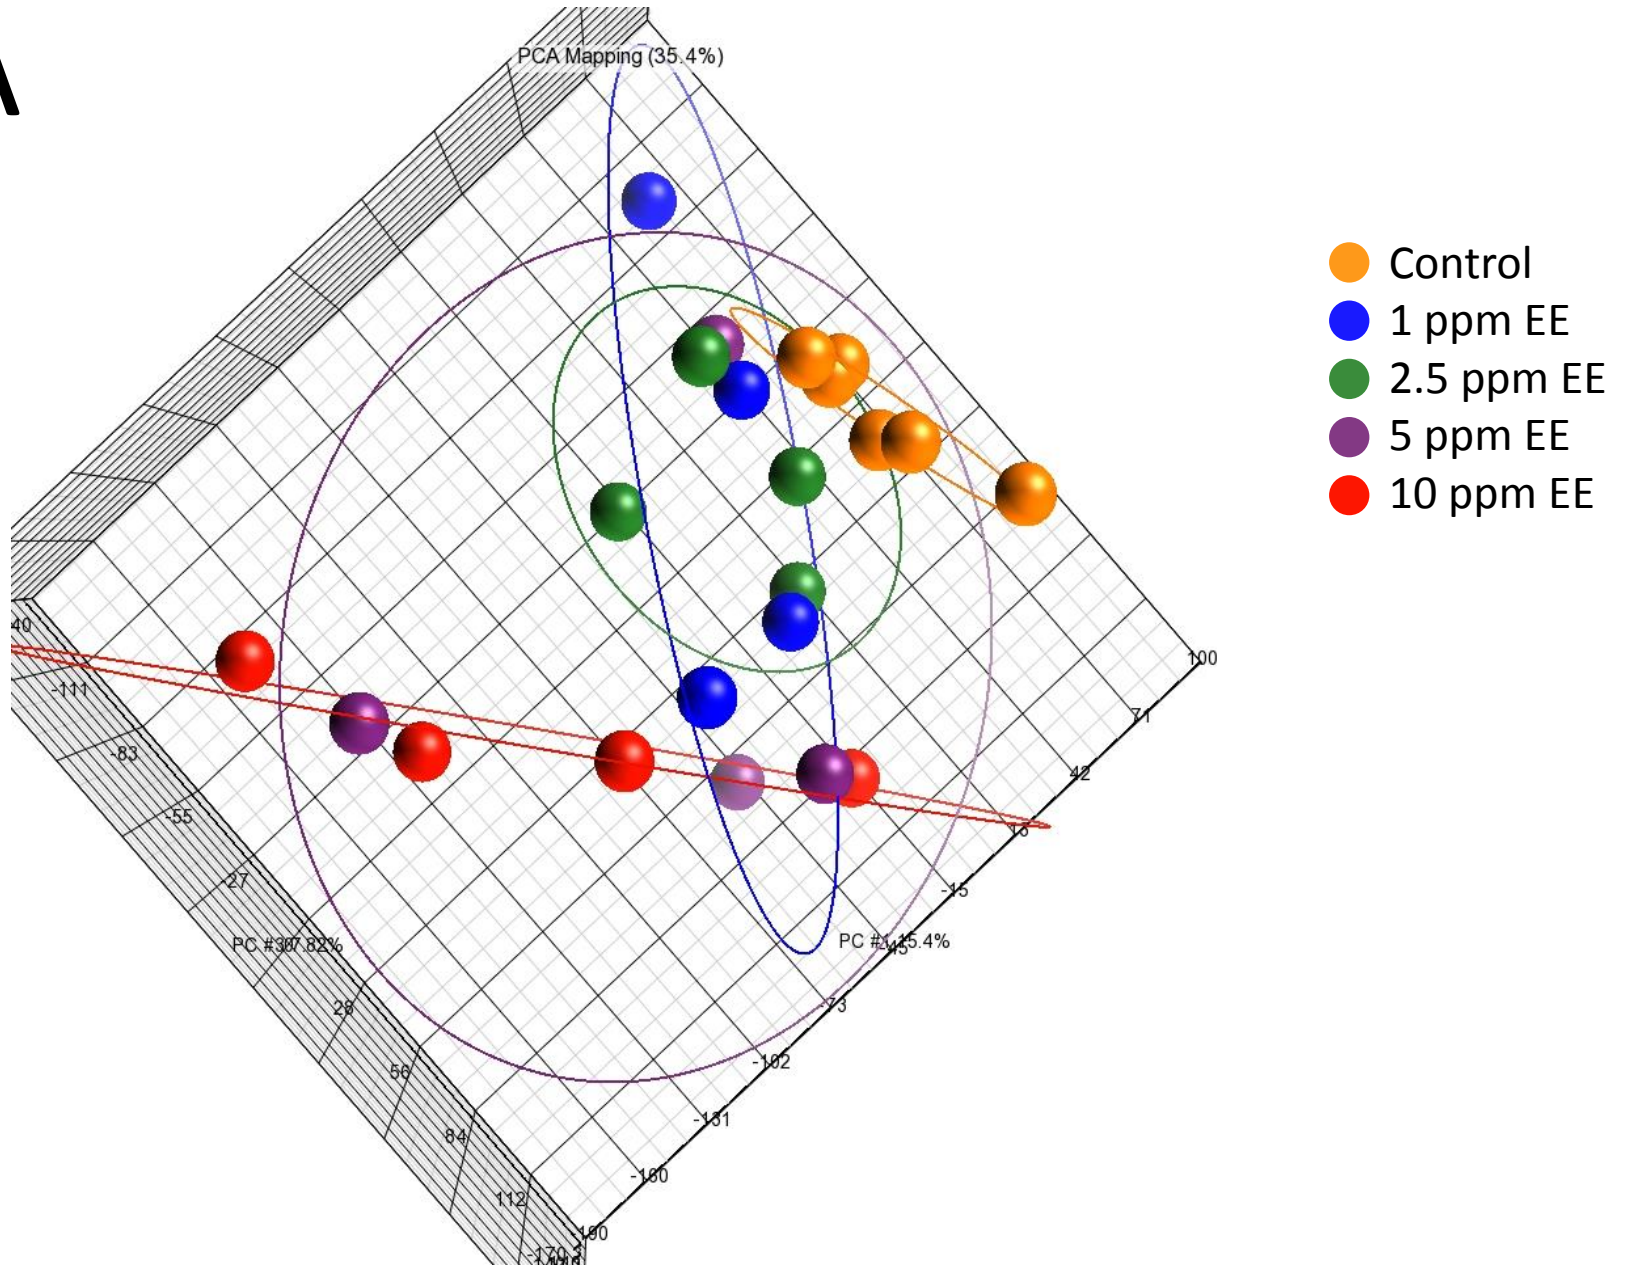

Supplemental Figure 3B

B

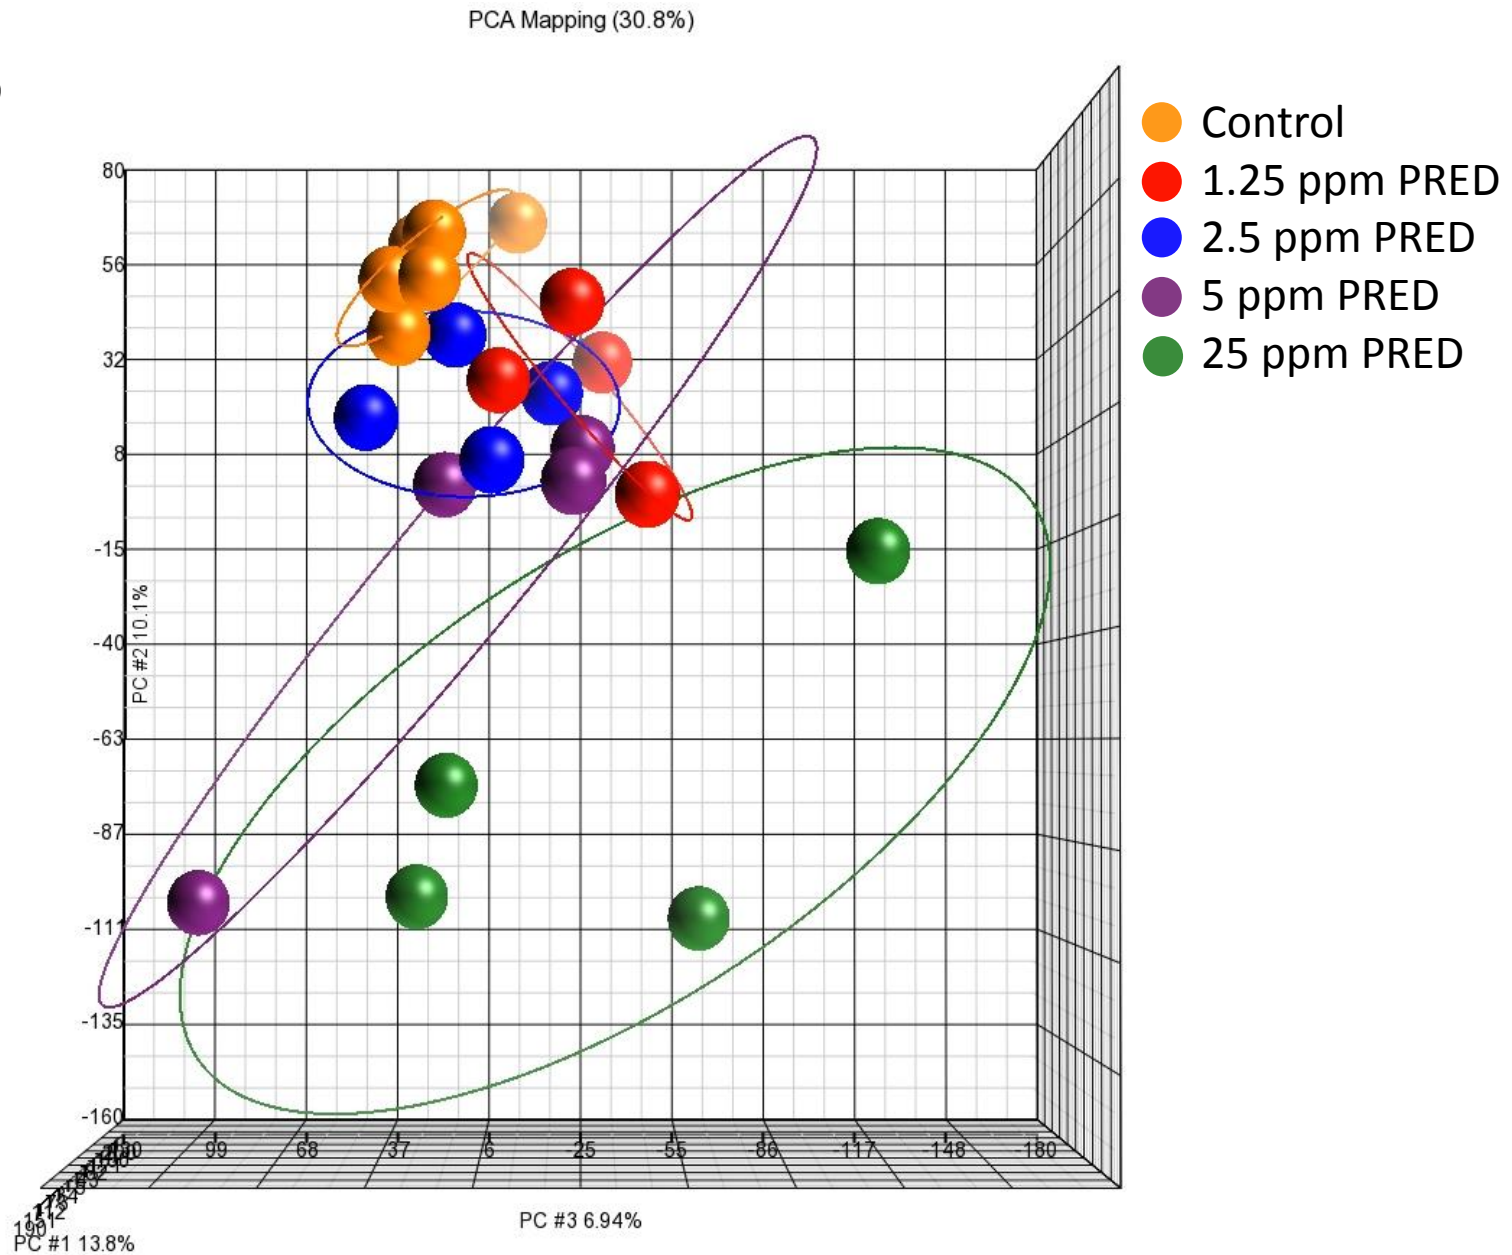

Supplemental Figure 3C

C

PCA Mapping (37.9%)

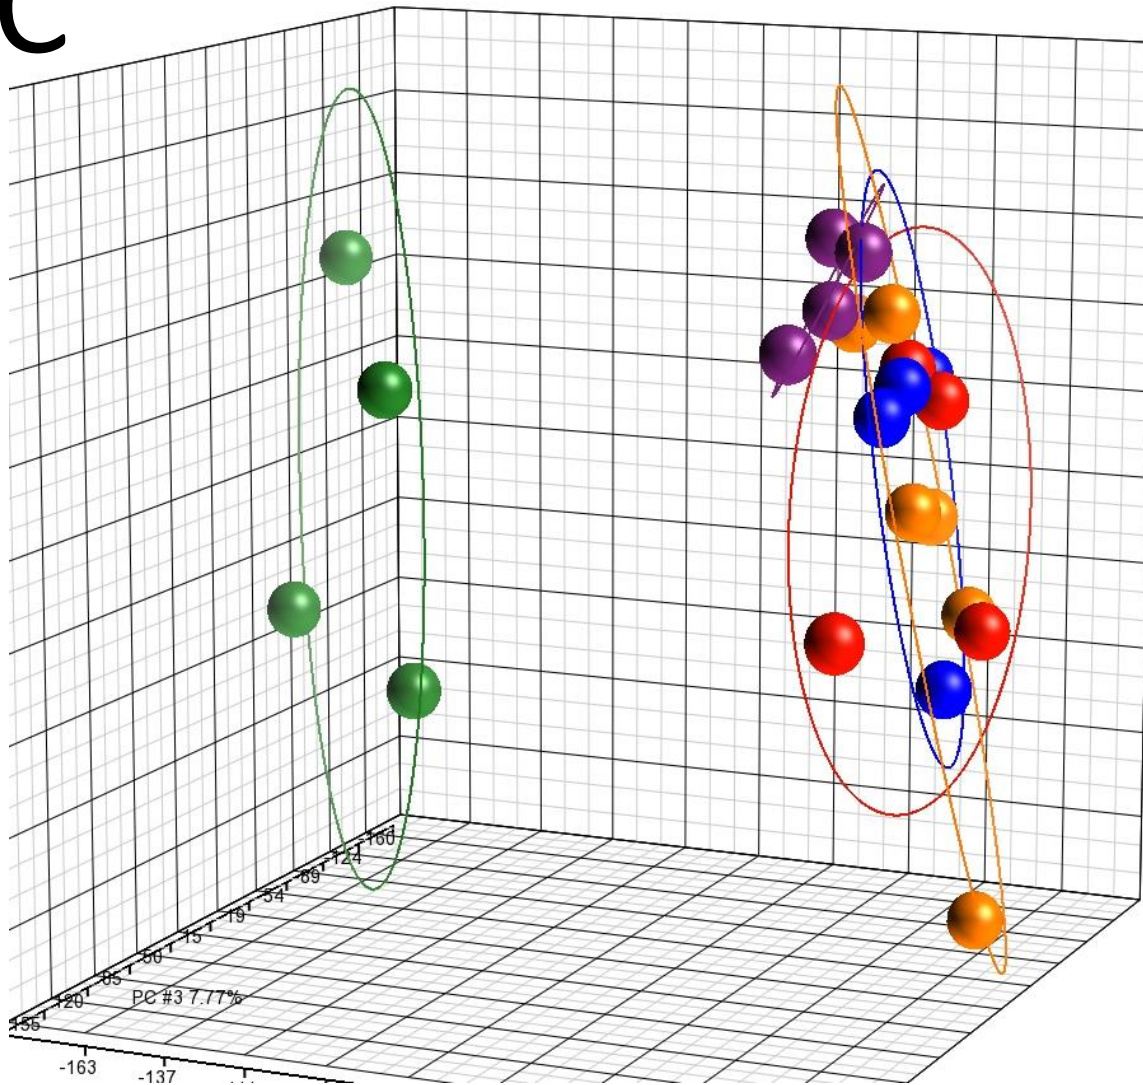

- Control
- 10 ppm EE
- 25 ppm PRED
- 0 mg/kg/day A4
- 50 mg/kg/day A4

# Supplemental Figure 4A

# A

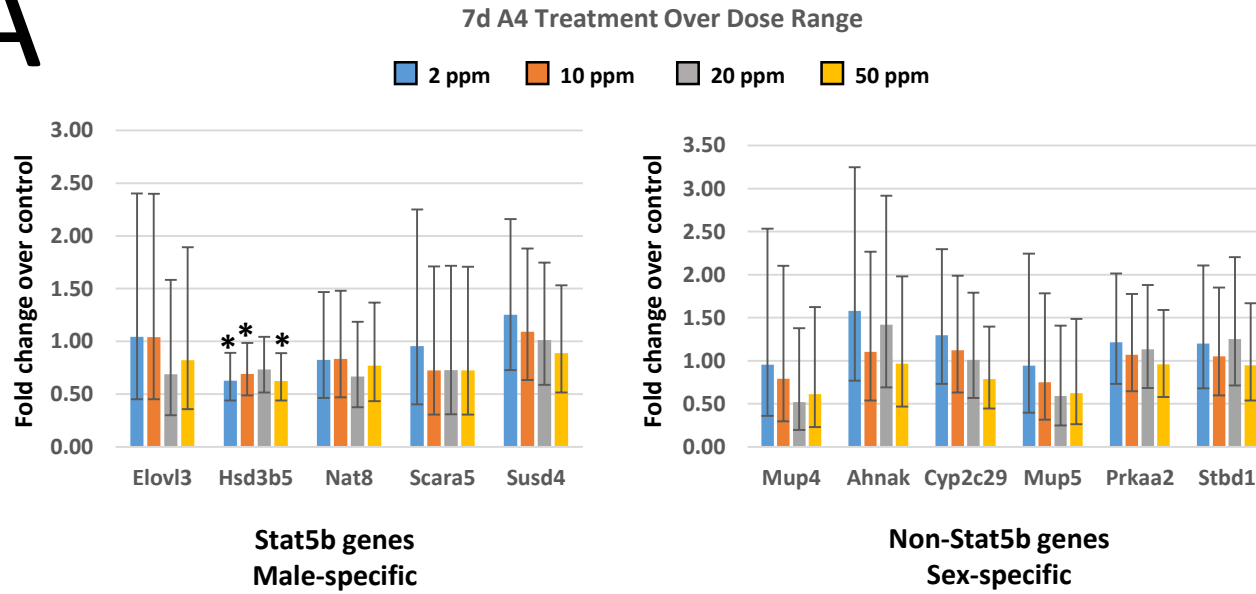

**B**

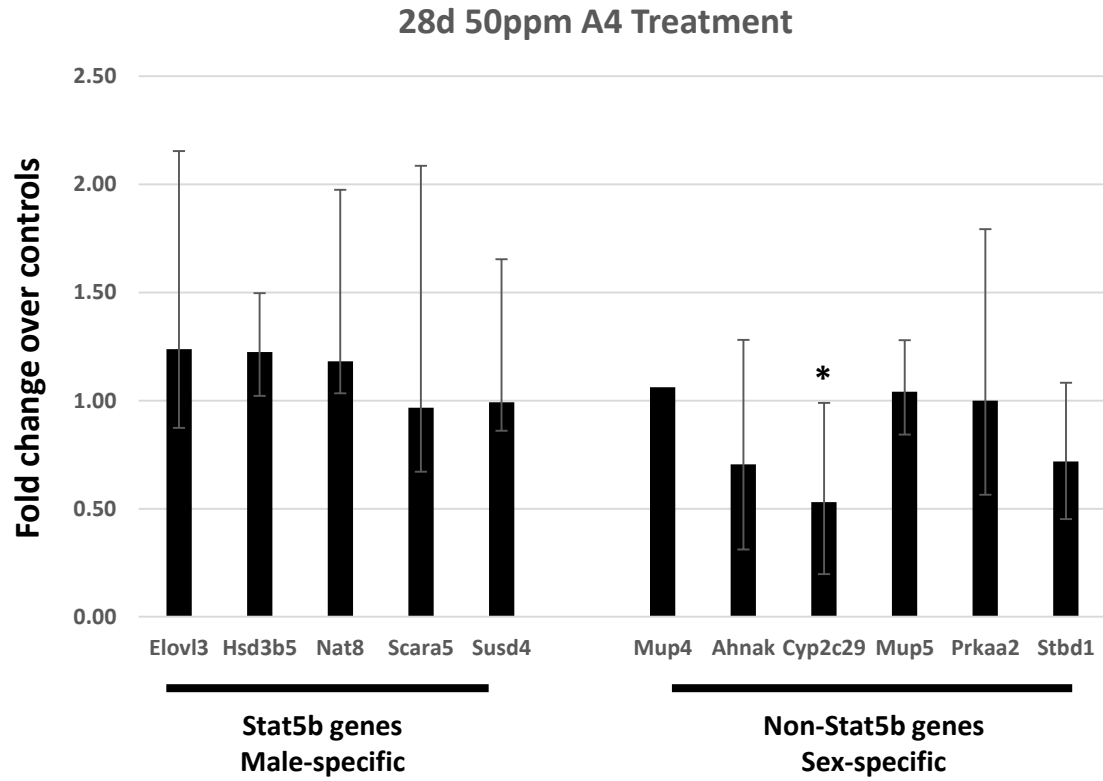



Supplemental Figure 5

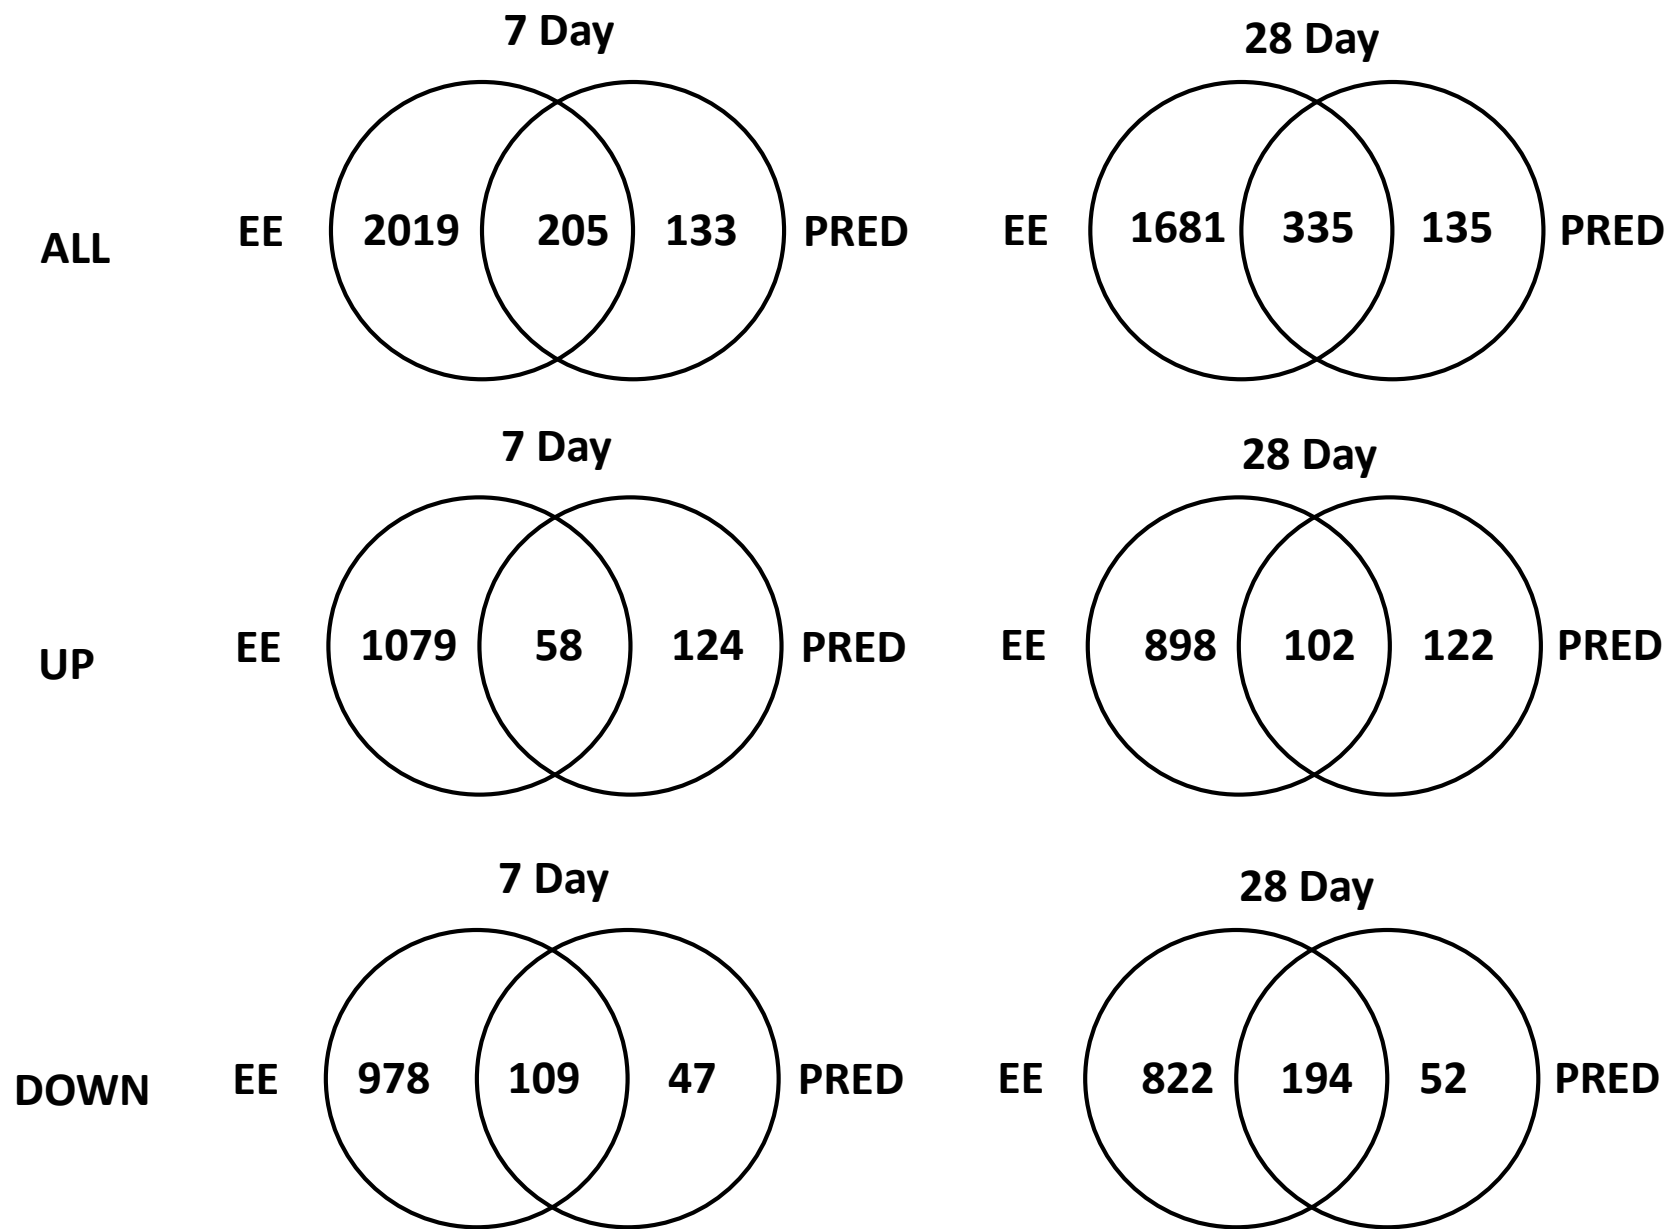

**A**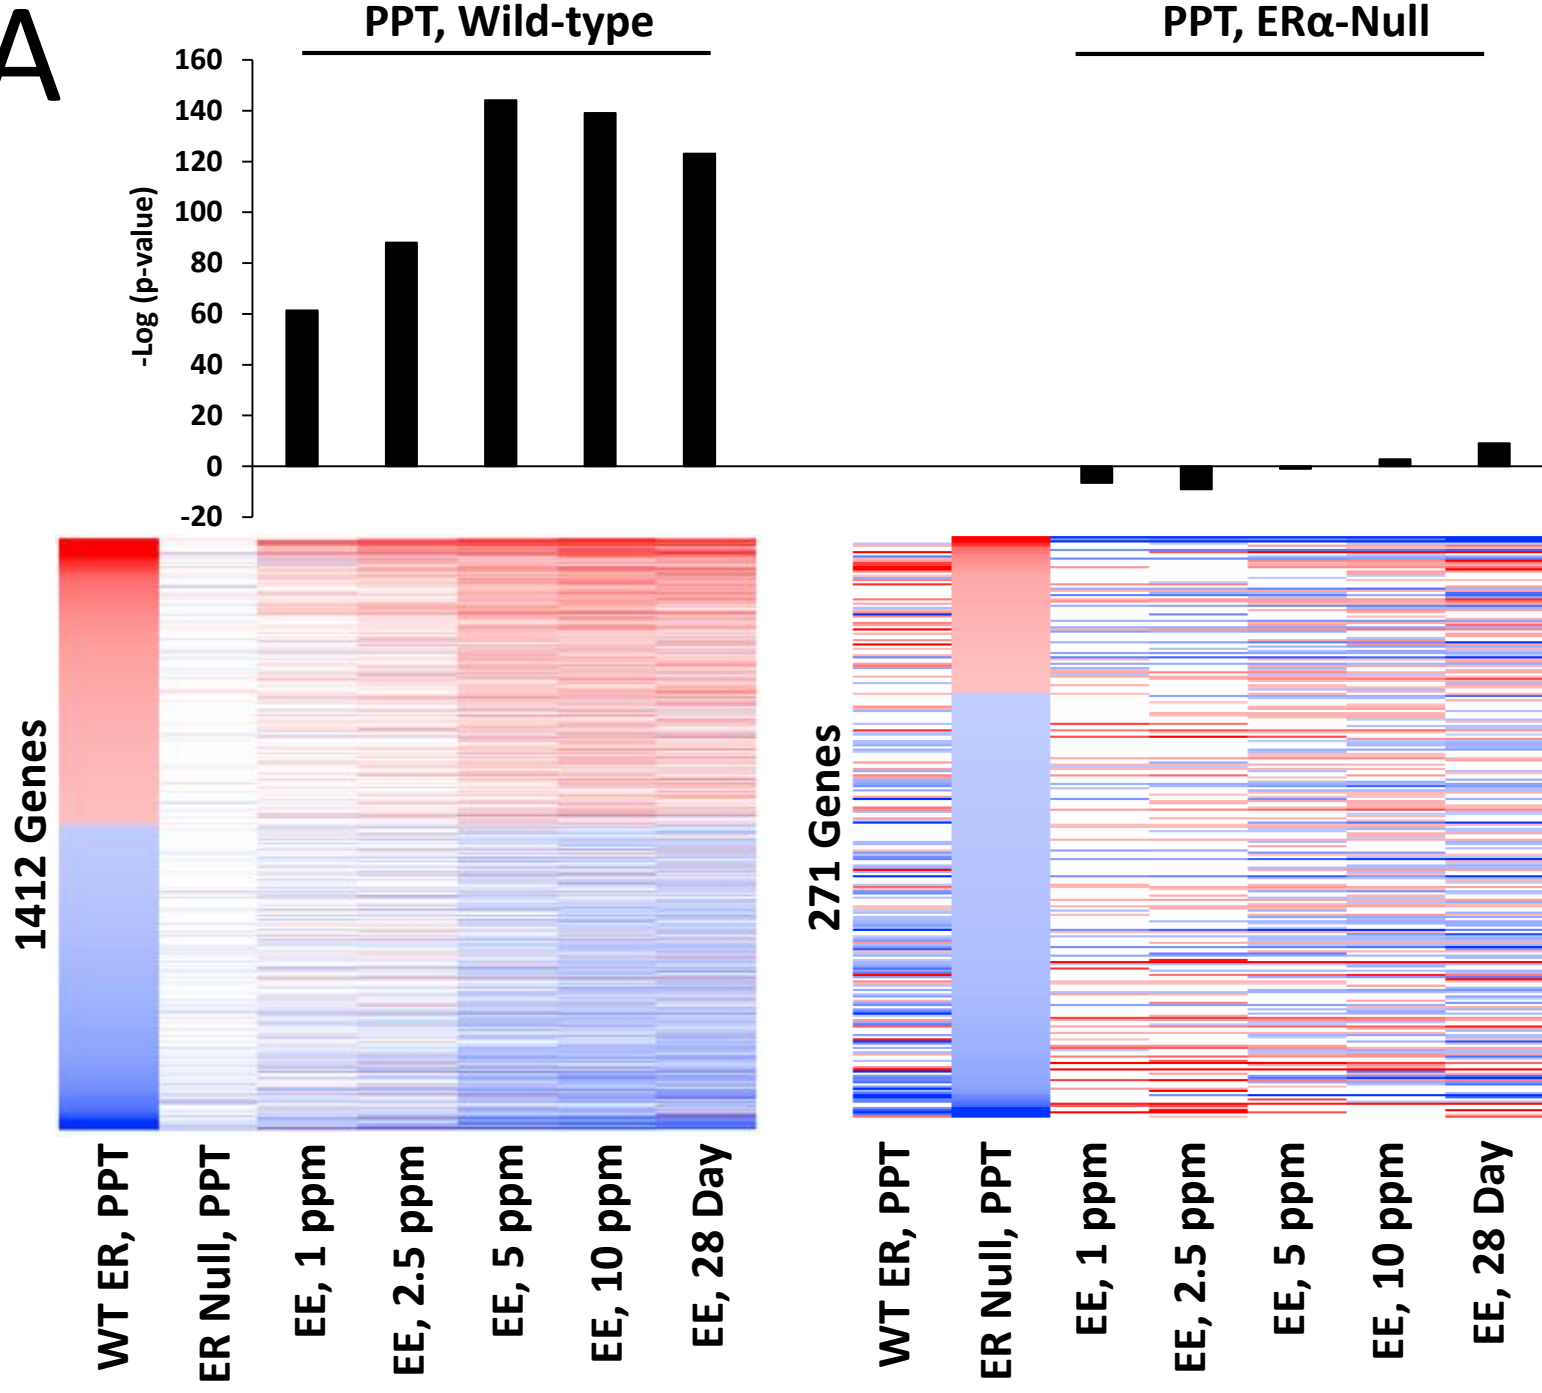

**B**

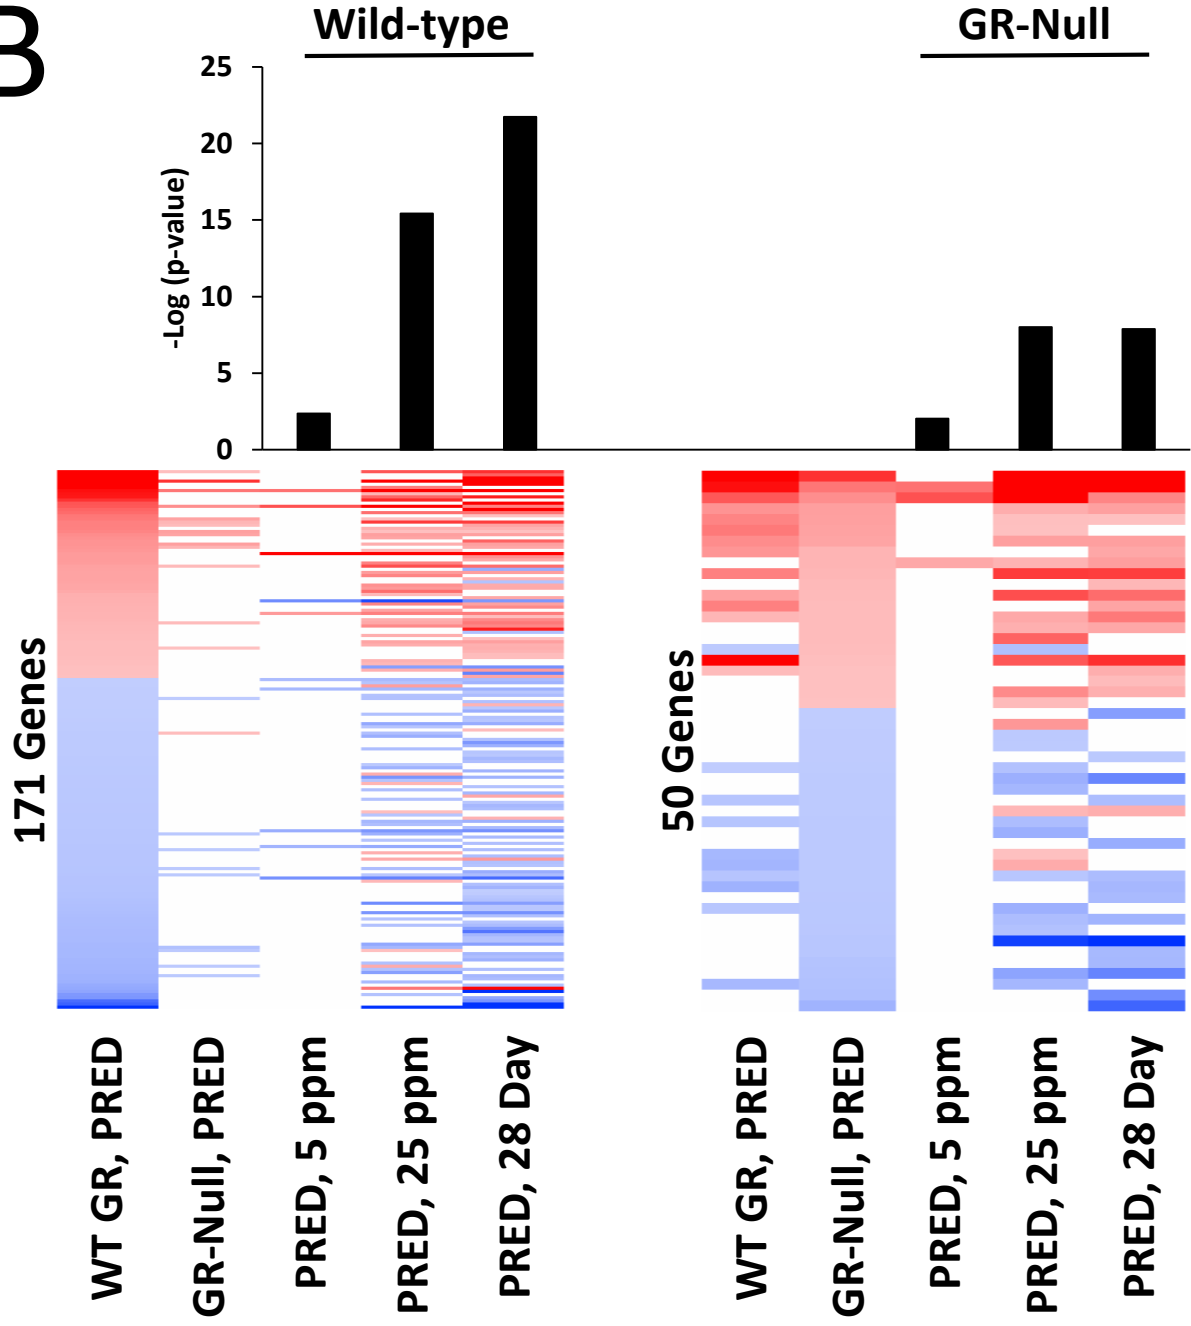

Supplemental Figure 7

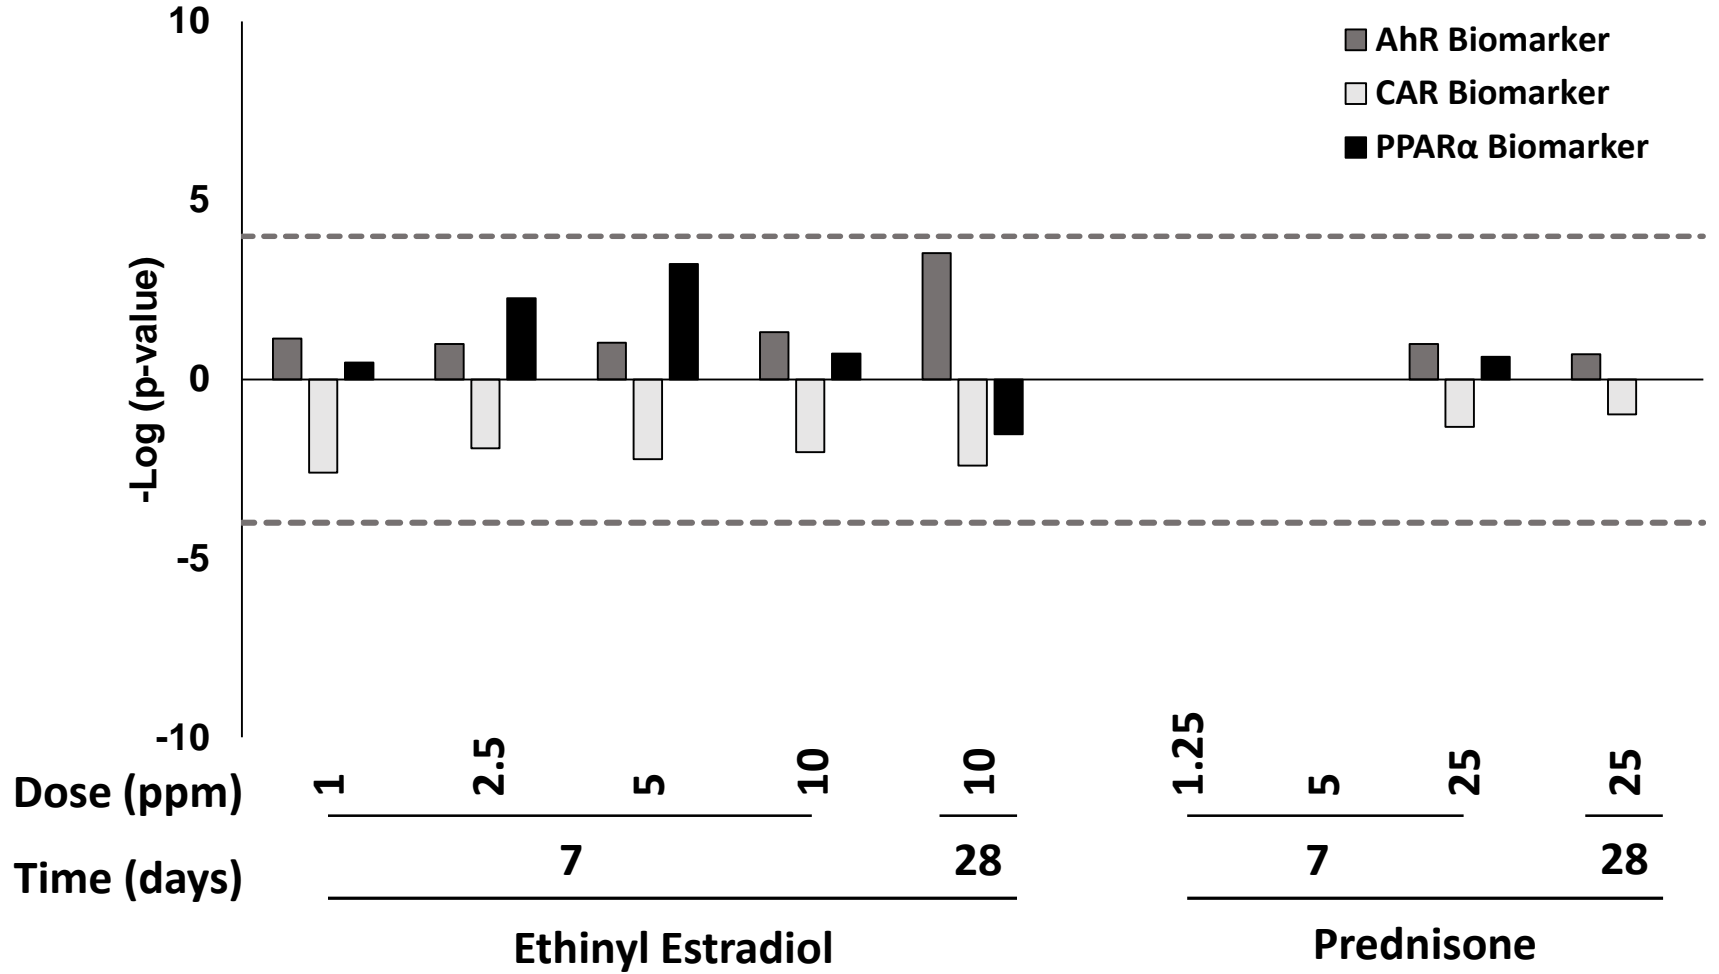

Supplemental Figure 8

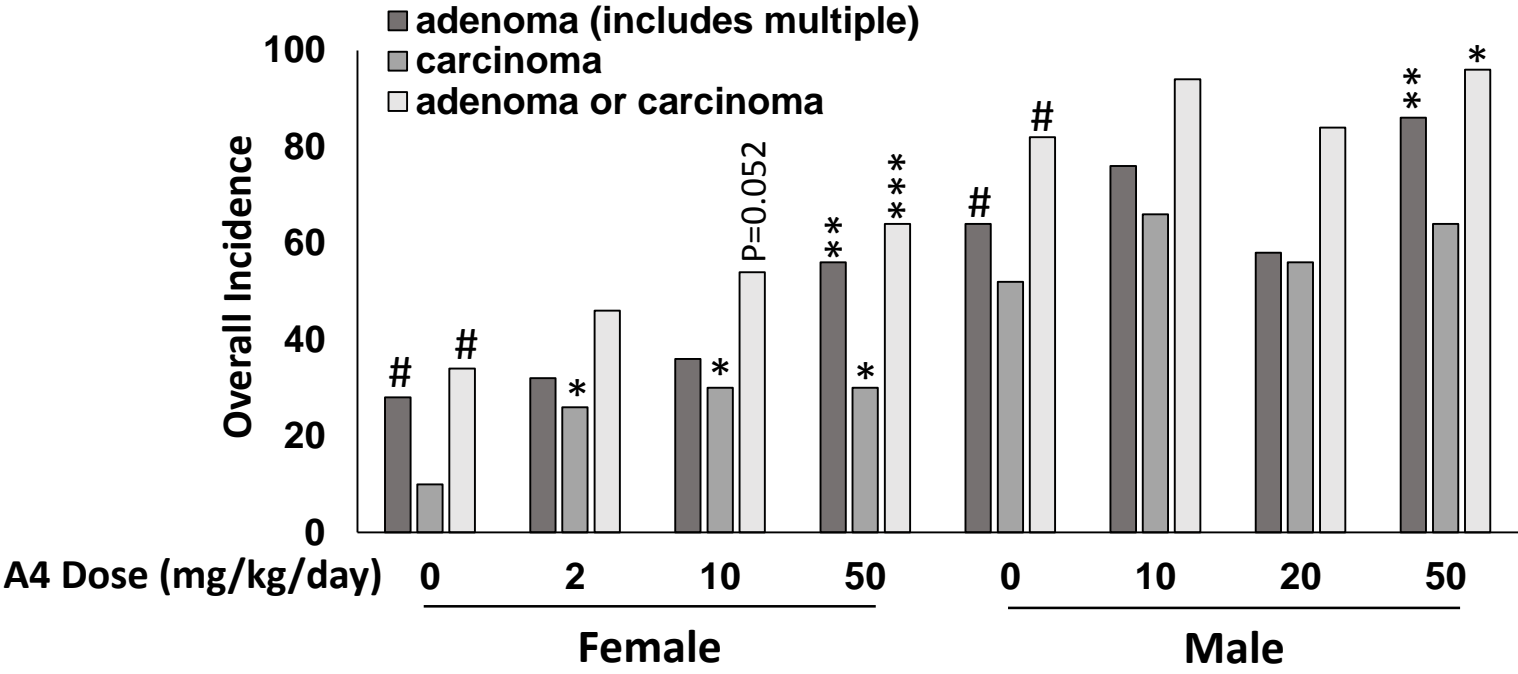

Supplement: NIHMS937775-supplement-supplemental_material.pdf [file NIHMS937775-supplement-supplemental_material.pdf]
